# Supplementary material for: RADtyping: An Integrated Package for Accurate De Novo Codominant and Dominant RAD Genotyping in Mapping Populations
Source: PubMed Central journal article supplement (PMC3836964; doi:10.1371/journal.pone.0079960), 2013-11-21
Supplement: pone.0079960.s001.pdf [file pone.0079960.s001.pdf]

## Supporting Information

**Table S1.** Evaluation of the *de novo* RADtyping approach using a pseudo F<sub>1</sub> mapping population. The simulated population was created by crossing two *Arabidopsis* plants with predefined SNPs in their genomes, and was subject to *in silico* sequencing together with their parents at different sequencing depths with sequencing errors enabled. *De novo* codominant and dominant genotyping was evaluated in three key aspects: genotype coverage (a, b), removal of repetitive sites (b, e), and genotyping accuracy (c, f).

Table S1a. Percentage of ungenotyped loci for codominant genotyping

| Parent<br>Progeny | Parent |        |        |        |        |
|-------------------|--------|--------|--------|--------|--------|
|                   | 10X    | 20X    | 30X    | 40X    | 50X    |
| 5X                | 0.9739 | 0.9668 | 0.9613 | 0.9622 | 0.9641 |
| 10X               | 0.3279 | 0.1435 | 0.1122 | 0.1095 | 0.1103 |
| 15X               | 0.2661 | 0.0627 | 0.0487 | 0.0391 | 0.0393 |
| 20X               | 0.2548 | 0.0538 | 0.0310 | 0.0240 | 0.0281 |
| 25X               | 0.2627 | 0.0510 | 0.0268 | 0.0249 | 0.0193 |
| 30X               | 0.2757 | 0.0493 | 0.0276 | 0.0230 | 0.0227 |

Table S1b. Percentage of repetitive loci for codominant genotyping

| Parent<br>Progeny | Parent |        |        |        |        |
|-------------------|--------|--------|--------|--------|--------|
|                   | 10X    | 20X    | 30X    | 40X    | 50X    |
| 5X                | 0.0407 | 0.0321 | 0.0255 | 0.0169 | 0.0159 |
| 10X               | 0.0139 | 0.0136 | 0.0120 | 0.0146 | 0.0165 |
| 15X               | 0.0133 | 0.0181 | 0.0201 | 0.0186 | 0.0175 |
| 20X               | 0.0174 | 0.0180 | 0.0206 | 0.0179 | 0.0219 |
| 25X               | 0.0184 | 0.0213 | 0.0173 | 0.0201 | 0.0217 |
| 30X               | 0.0176 | 0.0181 | 0.0188 | 0.0204 | 0.0204 |

Table S1c. Error rate for codominant genotyping

| Parent<br>Progeny | Parent |        |        |        |        |
|-------------------|--------|--------|--------|--------|--------|
|                   | 10X    | 20X    | 30X    | 40X    | 50X    |
| 5X                | 0.3028 | 0.2985 | 0.2758 | 0.2809 | 0.2763 |
| 10X               | 0.1243 | 0.1251 | 0.1233 | 0.1232 | 0.1267 |
| 15X               | 0.0430 | 0.0495 | 0.0511 | 0.0489 | 0.0497 |
| 20X               | 0.0252 | 0.0269 | 0.0283 | 0.0266 | 0.0304 |
| 25X               | 0.0189 | 0.0211 | 0.0184 | 0.0214 | 0.0220 |
| 30X               | 0.0142 | 0.0162 | 0.0175 | 0.0185 | 0.0186 |

Table S1d. Percentage of ungenotyped loci for dominant genotyping

| Parent<br>Progeny | Parent |        |        |        |        |
|-------------------|--------|--------|--------|--------|--------|
|                   | 10X    | 20X    | 30X    | 40X    | 50X    |
| 5X                | 0.9901 | 0.9868 | 0.9858 | 0.9865 | 0.9863 |
| 10X               | 0.2082 | 0.0940 | 0.0964 | 0.0906 | 0.1014 |
| 15X               | 0.1561 | 0.0393 | 0.0359 | 0.0367 | 0.0359 |
| 20X               | 0.1543 | 0.0402 | 0.0367 | 0.0364 | 0.0363 |
| 25X               | 0.1570 | 0.0400 | 0.0363 | 0.0368 | 0.0370 |
| 30X               | 0.1528 | 0.0401 | 0.0371 | 0.0380 | 0.0368 |

Table S1e. Percentage of repetitive loci for dominant genotyping

| Parent<br>Progeny | Parent |        |        |        |        |
|-------------------|--------|--------|--------|--------|--------|
|                   | 10X    | 20X    | 30X    | 40X    | 50X    |
| 5X                | 0.0839 | 0.0684 | 0.0588 | 0.0825 | 0.0711 |
| 10X               | 0.0055 | 0.0044 | 0.0042 | 0.0048 | 0.0040 |
| 15X               | 0.0058 | 0.0043 | 0.0042 | 0.0045 | 0.0045 |
| 20X               | 0.0058 | 0.0045 | 0.0044 | 0.0039 | 0.0042 |
| 25X               | 0.0051 | 0.0039 | 0.0043 | 0.0041 | 0.0038 |
| 30X               | 0.0053 | 0.0041 | 0.0041 | 0.0039 | 0.0039 |

Table S1f. Error rate for dominant genotyping

| Parent<br>Progeny | Parent |        |        |        |        |
|-------------------|--------|--------|--------|--------|--------|
|                   | 10X    | 20X    | 30X    | 40X    | 50X    |
| 5X                | 0.0546 | 0.0414 | 0.0404 | 0.0486 | 0.0409 |
| 10X               | 0.0180 | 0.0180 | 0.0180 | 0.0180 | 0.0173 |
| 15X               | 0.0212 | 0.0219 | 0.0213 | 0.0215 | 0.0212 |
| 20X               | 0.0215 | 0.0208 | 0.0216 | 0.0206 | 0.0210 |
| 25X               | 0.0207 | 0.0208 | 0.0206 | 0.0205 | 0.0199 |
| 30X               | 0.0233 | 0.0230 | 0.0237 | 0.0236 | 0.0225 |
